# Supplementary material for: Teleost Fish Mount Complex Clonal IgM and IgT Responses in Spleen upon Systemic Viral Infection
Source: PLOS journal article supplement (doi:10.1371/journal.ppat.1003098), 2013-01-10
Supplement: S7 (10.1371/journal.ppat.1003098.s007) [file journal.ppat.1003098.s007]

Figure S7. Complementary data from 454 pyrosequencing.

A. JH usage in VH4C $\mu$  expressed rearrangements.

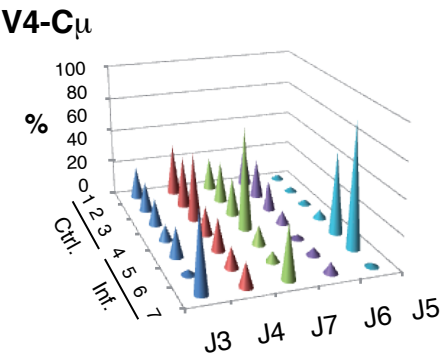

B. Normalized distributions of JST observed n times in the sequence datasets from control and virus infected fish are represented for VH5.4 C $\mu$

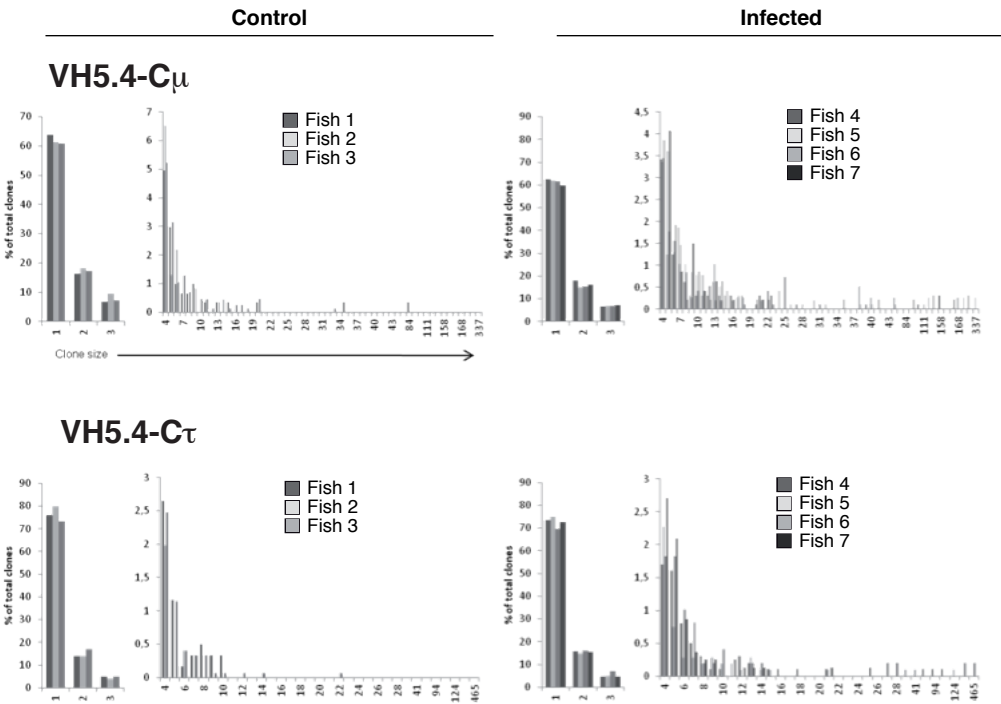

C. Normalized distributions of JST observed n times in the sequence datasets from control and virus infected fish are represented for VH5.4 C $\tau$ .
